# Supplementary material for: Investigation of random lasing from all-inorganic halide perovskite quantum dots prepared under ambient conditions
Source: Royal Society of Chemistry journal article supplement (doi:10.1039/d0nr08326g), 2021-01-01
Supplement: d0nr08326g1.pdf [file d0nr08326g1.pdf]

# Supporting information

## Investigation of Random Lasing from All-Inorganic Halide Perovskite Quantum Dots Prepared at Ambient Condition

Deng-Gui Zhang,<sup>†</sup> Liang-Yu Jian,<sup>†</sup> Zong-Liang Tseng,<sup>\*,‡</sup> Hsin-Ming Cheng,<sup>‡</sup> and Ja-Hon Lin<sup>\*,†</sup>

<sup>†</sup>Department of Electro-Optical Engineering, National Taipei University of Technology, Taipei 106, Taiwan

<sup>‡</sup>Organic Electronics Research Center and Department of Electronic Engineering, Ming Chi University of Technology, New Taipei City, Taiwan

E-mail: [zltseeng@mail.mcut.edu.tw](mailto:zltseeng@mail.mcut.edu.tw); [jhlin@ntut.edu.tw](mailto:jhlin@ntut.edu.tw)

1. Temperature dependent PL of CsPbBr<sub>3</sub> QDs film
2. Gain measurement of CsPbBr<sub>3</sub> QDs film

# Temperature dependent PL of CsPbBr<sub>3</sub> QDs film

Figure S1(a) shows the normalized two-dimensional (2D) map of CsPbBr<sub>3</sub> QDs film from 77 K to 300 K. Unlike variation of PL from typical semiconductor showing red-shift with temperature because of the electron-phonon interaction,<sup>1-2</sup> the PL peak of CsPbBr<sub>3</sub> QDs film reveals blue-shift owing to the thermal expansion of lattice.<sup>3</sup> Figure S1(b) shows the variation of optical band gap ( $E_g$ ) of CsPbBr<sub>3</sub> QDs film as temperature increases from 78K to 300K, which can be described by <sup>4-5</sup>

$$E_g(T) = E_0 + A_{TE}T + A_{EP} \left[ \frac{2}{\exp\left(\frac{\hbar\omega}{K_B T}\right) - 1} + 1 \right], \quad (S1)$$

where  $E_0$  is the band gap at 0 K,  $A_{TE}$  and  $A_{EP}$  are the weight of the thermal expansion and electron-phonon interaction, respectively.  $\hbar\omega$  is the average optical phonon energy,  $K_B$  is Boltzmann constant. By the fitting of Eq. (S1) (red solid curve in Fig. S1(b)), four parameters,  $E_0 = 2.364$  eV,  $A_{TE} = 0.263$  meV/K,  $A_{EP} = -66$  meV,  $\hbar\omega = 59$  meV, can be obtained. The red solid curve can be decomposed by the two curve, includes green dash line and blue dash-dot curve to illustrate the thermal expansion and electron-phonon interaction, respectively. Below 140 K, the linear-increase of PL peak was dominated by  $A_{TE}$  and  $A_{EP}$  was negligible due to the unsubstantial populated optical phonon modes. For the higher temperature, the optical phonon (blue dash line in Fig. S1(b)) modes are appreciably populated, leading to a reduction of optical band gap.

Figure S1(c) shows the temperature-dependent FWHM of CsPbBr<sub>3</sub> QDs film which can be described by equation<sup>4, 6</sup>

$$\Gamma(T) = \Gamma_{inh} + \sigma T + \frac{\Gamma_{LO}}{\exp\left(\frac{E_{LO}}{K_B T}\right) - 1}, \quad (S2)$$

where  $\Gamma_{inh}$  is the inhomogeneous broadening and the other two terms contribute to the

homogeneous broadening. Here,  $\sigma$ ,  $\Gamma_{LO}$ ,  $K_B$  and  $E_{LO}$  are the exciton–acoustic phonon coupling coefficient, exciton–longitudinal optical (LO) phonon coupling coefficient, Boltzmann constant, and the LO phonon energy, respectively. From the best fitting by the Eq. (S2) (red solid curve in Fig. S1(c)), we can also obtain the parameters  $\Gamma_{inh}=61.3$  meV,  $\sigma=71.6$   $\mu\text{eV/K}$ ,  $\Gamma_{LO}=90.2$  meV,  $E_{LO}=58.9$  meV. In general, the electron - LO phonon interaction ( $\Gamma_{LO}$ ) is much larger than the interaction between electrons - acoustic phonons ( $\sigma$ ), which can almost be negligible for the variation of FWHM.

In Fig. S1(d), the peak intensity decreases with the increase of temperature, which indicates the thermal quenching of PL of CsPbBr<sub>3</sub> QDs film. In general, the temperature dependence of the PL intensity can be accounted for the Arrhenius equation<sup>7</sup>

$$I(T) = \frac{I_0}{1 + A \exp(-E_B/K_B T)}, \quad (\text{S3})$$

where  $I_0$  is peak intensity at 0 K,  $K_B$  is Boltzmann constant and  $E_B$  is binding energy.

By the well-fitting of Eq. (S3), the binding energy ( $E_B$ ) of CsPbBr<sub>3</sub> QDs is around 49 meV, which is very close to previously report<sup>1</sup> around 50 meV.

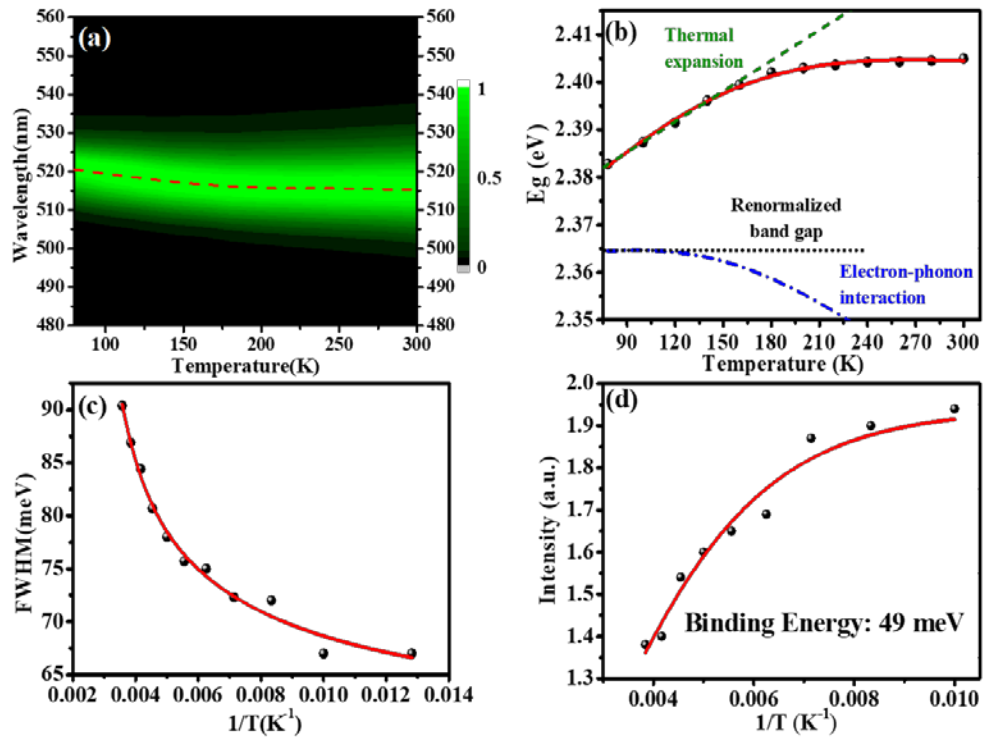

**Figure S1.** Temperature-dependent PL measurement of CsPbBr<sub>3</sub> QDs film with (a) two-dimensional (2D) map of the normalized PL, (b) band gap, (c) FWHM, and (d) PL peak intensity.

## Gain measurement of CsPbBr<sub>3</sub> QDs film

The optical gain is an important parameter for assessing the possibility of realizing random lasing. The optical gain coefficients of the CsPbBr<sub>3</sub> QD film were measured via the variable stripe length (VSL) method. In Fig. S2(a), the sample was excited by stripe pump beam which was focused by a cylindrical lens. The length of stripe was controlled by a moving blade. The variation of the integrated ASE intensity as a function of stripe length is shown in Fig. S2(b) that can be well fitted by the following equation<sup>8-9</sup>

$$I(L) = (A/g)[\exp(gL)-1], \quad (\text{S4})$$

where  $I$ ,  $A$ ,  $g$ , and  $L$  are the detected amplified spontaneous emission (ASE) intensity, the cross-sectional excited area mapped by the penetration depth, gain coefficient, and excitation stripe length of CsPbBr<sub>3</sub> QDs, respectively. By the fitting of Eq. (S4), the gain coefficient of S-I and S-II are around 64 cm<sup>-1</sup> and 73 cm<sup>-1</sup>.

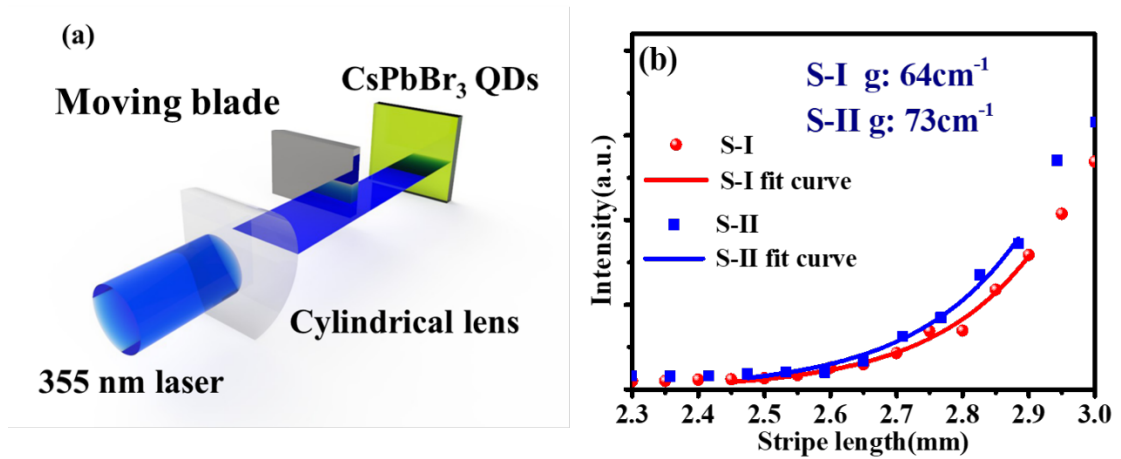

**Figure S2.** Gain measurement from CsPbBr<sub>3</sub> QDs by means of the variable stripe method with (a) schematic setup, and (b) ASE peak intensity as a function of stripe length from S-I (red circles) and S-II (blue circles). Red and blue solid line show the fitting curves by the Eq (S4).

## Random lasing emission spectrum at different angle

Figure S3(a)-(c) show the random lasing spectrum with the angle  $\theta$  relative to the edge direction of the sample. It is obviously to see a number of spikes on top of emission spectrum at different angle. The setup in Fig. S3(c) illustrates the pump excitation from 355 nm Q-switched laser and the measured direction relative to the edge direction of sample.

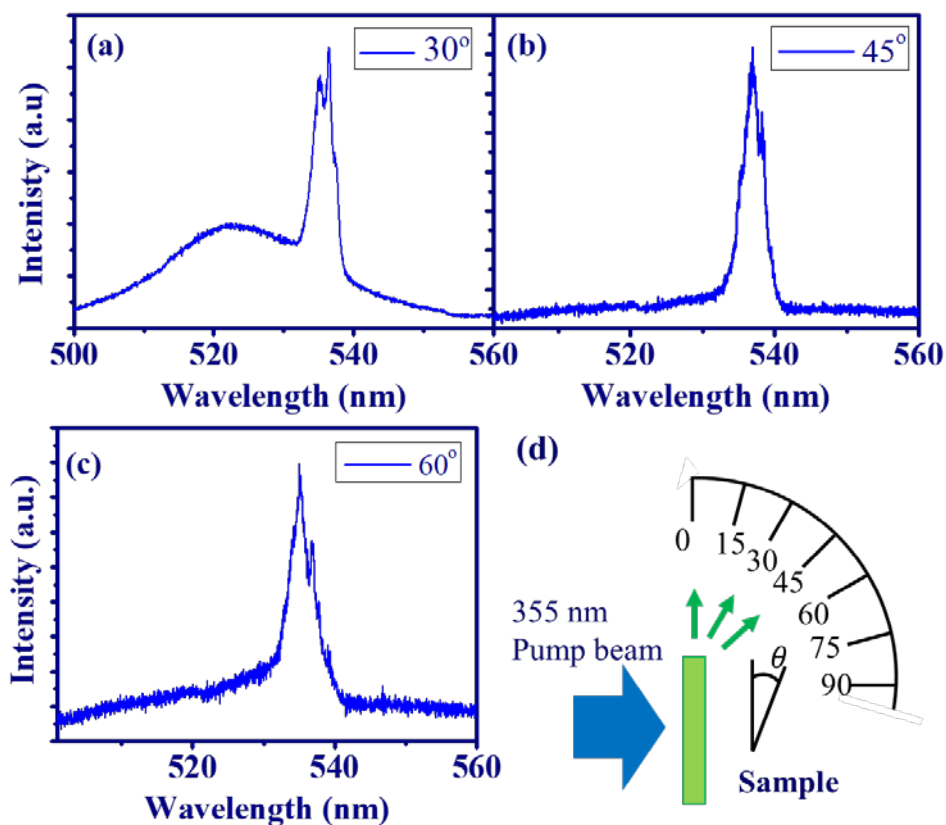

**Figure S3** Random lasing spectrum with angle (a)  $\theta=30^\circ$ , (b)  $\theta=45^\circ$ , (c)  $\theta=60^\circ$  relative to the edge of the perovskite. (d) Schematic illustration to describe the setup for the random laser generation and the measured direction relative to the edge direction of sample.

## References

1. Jiang, D.-S.; Jung, H.; Ploog, K., Temperature dependence of photoluminescence from GaAs single and multiple quantum-well heterostructures grown by molecular-beam epitaxy. *Journal of applied physics* **1988**, *64* (3), 1371-1377.
2. Manoogian, A.; Woolley, J., Temperature dependence of the energy gap in semiconductors. *Canadian journal of physics* **1984**, *62* (3), 285-287.
3. Shinde, A.; Gahlaut, R.; Mahamuni, S., Low-temperature photoluminescence studies of CsPbBr<sub>3</sub> quantum dots. *The Journal of Physical Chemistry C* **2017**, *121* (27), 14872-14878.
4. Ai, B.; Liu, C.; Deng, Z.; Wang, J.; Han, J.; Zhao, X., Low temperature photoluminescence properties of CsPbBr<sub>3</sub> quantum dots embedded in glasses. *Physical Chemistry Chemical Physics* **2017**, *19* (26), 17349-17355.
5. Wei, K.; Xu, Z.; Chen, R.; Zheng, X.; Cheng, X.; Jiang, T., Temperature-dependent excitonic photoluminescence excited by two-photon absorption in perovskite CsPbBr<sub>3</sub> quantum dots. *Optics letters* **2016**, *41* (16), 3821-3824.
6. Zhang, C.; Zhang, H.; Wang, R.; You, D.; Wang, W.; Xu, C.; Dai, J., Exciton photoluminescence of CsPbBr<sub>3</sub>@ SiO<sub>2</sub> quantum dots and its application as a phosphor material in light-emitting devices. *Optical Materials Express* **2020**, *10* (4), 1007-1017.
7. Wolf, C.; Lee, T.-W., Exciton and lattice dynamics in low-temperature processable CsPbBr<sub>3</sub> thin-films. *Materials today energy* **2018**, *7*, 199-207.
8. Zhang, L.; Yuan, F.; Dong, H.; Jiao, B.; Zhang, W.; Hou, X.; Wang, S.; Gong, Q.; Wu, Z., One-Step Co-Evaporation of All-Inorganic Perovskite Thin Films with Room-Temperature Ultralow Amplified Spontaneous Emission Threshold and Air Stability. *ACS applied materials & interfaces* **2018**, *10* (47), 40661-40671.
9. Zhao, C.; Tian, W.; Liu, J.; Sun, Q.; Luo, J.; Yuan, H.; Gai, B.; Tang, J.; Guo, J.; Jin, S., Stable Two-Photon Pumped Amplified Spontaneous Emission from Millimeter-Sized CsPbBr<sub>3</sub> Single Crystals. *The journal of physical chemistry letters* **2019**, *10* (10), 2357-2362.
